# Supplementary material for: The Association between Online Learning and Food Consumption and Lifestyle Behaviors and Quality of Life in Terms of Mental Health of Undergraduate Students during COVID-19 Restrictions
Source: MDPI journal article supplement (doi:10.3390/nu14040890), 2022-02-20
Supplement: s1 [file s1]

**Supplementary Table S1.** Distribution of the food consumption behaviors, lifestyles, and quality of life in mental health of participants by duration of online learning (h/day) factor (n =464).

| Variables                                     | Duration of online learning, h/day |            |           | p-value<br>(Chi-square) |
|-----------------------------------------------|------------------------------------|------------|-----------|-------------------------|
|                                               | < 3                                | 3-6        | >6        |                         |
|                                               | n (%)                              | n (%)      | n (%)     |                         |
| Frequency of fruit and vegetable consumption  |                                    |            |           |                         |
| ≤ 4 days/week                                 | 35 (66.0)                          | 251 (71.7) | 43 (74.1) | 0.635                   |
| > 4 days/week                                 | 18 (34.0)                          | 102 (28.9) | 15 (25.9) |                         |
| Fresh vegetable consumption                   |                                    |            |           |                         |
| <4 servings/day                               | 38 (71.7)                          | 239 (67.7) | 37 (63.8) | 0.673                   |
| ≥4 servings/day                               | 15 (28.3)                          | 114 (32.3) | 21 (36.2) |                         |
| Fruit consumption                             |                                    |            |           |                         |
| <3 servings/day                               | 36 (67.9)                          | 208 (58.9) | 31 (53.4) | 0.290                   |
| ≥3 servings/day                               | 17 (32.1)                          | 145 (41.1) | 27 (46.6) |                         |
| Frequency of high-fat diet consumption        |                                    |            |           |                         |
| ≤ 4 days/week                                 | 36 (67.9)                          | 275 (77.9) | 47 (81.0) | 0.205                   |
| > 4 days/week                                 | 17 (32.1)                          | 78 (22.1)  | 11 (19.0) |                         |
| Frequency of snack consumption                |                                    |            |           |                         |
| ≤ 4 days/week                                 | 44 (83.0)                          | 309 (87.5) | 51 (86.5) | 0.644                   |
| > 4 days/week                                 | 9 (17.0)                           | 44 (12.5)  | 7 (12.1)  |                         |
| Frequency of western diet consumption         |                                    |            |           |                         |
| ≤ 4 days/week                                 | 48 (90.6)                          | 340 (96.3) | 53 (91.4) | 0.077                   |
| > 4 days/week                                 | 5 (9.4)                            | 13 (3.7)   | 5 (8.6)   |                         |
| Frequency of sugary beverage consumption      |                                    |            |           |                         |
| ≤ 4 days/week                                 | 27 (50.9)                          | 251 (71.1) | 40 (69.0) | 0.013*                  |
| > 4 days/week                                 | 26 (49.1)                          | 102 (28.9) | 18 (31.0) |                         |
| Frequency of instant food consumption         |                                    |            |           |                         |
| ≤ 4 days/week                                 | 48 (90.6)                          | 340 (96.3) | 57 (98.3) | 0.089                   |
| > 4 days/week                                 | 4 (9.4)                            | 13 (3.7)   | 1 (1.7)   |                         |
| Eating foods or snacks during online learning |                                    |            |           |                         |
| No                                            | 34 (64.2)                          | 234 (66.3) | 36 (62.1) | 0.802                   |
| Yes                                           | 19 (35.8)                          | 119 (33.7) | 22 (37.9) |                         |
| Drinking beverages during online learning     |                                    |            |           |                         |
| No                                            | 13 (24.5)                          | 60 (17.0)  | 13 (22.4) | 0.302                   |
| Yes                                           | 40 (75.7)                          | 293 (83.0) | 45 (77.6) |                         |
| Duration of exercise                          |                                    |            |           |                         |
| No exercise                                   | 32 (60.4)                          | 187 (53.0) | 30 (51.7) | 0.476                   |
| < 3 times or 150 min/week                     | 16 (30.2)                          | 116 (32.9) | 16 (27.6) |                         |
| ≥ 3 times or 150 min/week                     | 5 (9.4)                            | 50 (14.2)  | 12 (20.7) |                         |
| Self-cooking                                  |                                    |            |           |                         |
| No                                            | 37 (69.8)                          | 210 (59.5) | 34 (58.5) | 0.340                   |
| Yes                                           | 16 (30.2)                          | 143 (40.5) | 24 (41.4) |                         |
| Skipping breakfast                            |                                    |            |           |                         |
| < 3 times/week or none                        | 28 (15.1)                          | 84 (23.8)  | 22 (37.9) | 0.016*                  |
| ≥ 3 times/week                                | 45 (84.9)                          | 269 (76.2) | 36 (62.1) |                         |
| The quality of life in mental health          |                                    |            |           |                         |
| Poor                                          | 9 (17.0)                           | 31 (8.8)   | 8 (13.8)  | 0.301                   |
| Fair                                          | 30 (56.6)                          | 231 (65.4) | 38 (65.5) |                         |
| Good                                          | 14 (26.4)                          | 91 (25.8)  | 12 (20.7) |                         |

Notes. n = numbers of participant; \*p-value < 0.05

**Supplementary Table S2.** Distribution of the food consumption behaviors, lifestyles, and quality of life in mental health of participants by duration of computer, tablet, and smartphone usage for online learning (h/day) factor (n =464).

| Variables                                     | Duration of computer, tablet, and smartphone<br>usage for online learning, h/day |            |            | p-value<br>(Chi-square) |
|-----------------------------------------------|----------------------------------------------------------------------------------|------------|------------|-------------------------|
|                                               | < 6                                                                              | 6-9        | >9         |                         |
|                                               | n (%)                                                                            | n (%)      | n (%)      |                         |
| Frequency of fruit and vegetable consumption  |                                                                                  |            |            |                         |
| ≤ 4 days/week                                 | 80 (74.8)                                                                        | 117 (66.5) | 132 (72.9) | 0.246                   |
| > 4 days/week                                 | 27 (25.2)                                                                        | 59 (33.5)  | 49 (27.1)  |                         |
| Fresh vegetable consumption                   |                                                                                  |            |            |                         |
| < 4 servings/day                              | 75 (70.1)                                                                        | 124 (70.5) | 115 (63.5) | 0.313                   |
| ≥ 4 servings/day                              | 32 (29.9)                                                                        | 52 (29.5)  | 66 (36.5)  |                         |
| Fruit consumption                             |                                                                                  |            |            |                         |
| < 3 servings/day                              | 61 (57.0)                                                                        | 107 (60.8) | 107 (59.1) | 0.820                   |
| ≥ 3 servings/day                              | 46 (43.0)                                                                        | 69 (39.2)  | 74 (40.9)  |                         |
| Frequency of high-fat diet consumption        |                                                                                  |            |            |                         |
| ≤ 4 days/week                                 | 83 (77.6)                                                                        | 142 (80.7) | 133 (73.5) | 0.267                   |
| > 4 days/week                                 | 24 (22.4)                                                                        | 34 (19.3)  | 48 (26.5)  |                         |
| Frequency of snack consumption                |                                                                                  |            |            |                         |
| ≤ 4 days/week                                 | 94 (87.9)                                                                        | 155 (88.1) | 155 (85.6) | 0.762                   |
| > 4 days/week                                 | 13 (12.1)                                                                        | 21 (11.9)  | 26 (14.4)  |                         |
| Frequency of western diet consumption         |                                                                                  |            |            |                         |
| ≤ 4 days/week                                 | 105 (98.1)                                                                       | 170 (96.6) | 166 (91.7) | 0.052                   |
| > 4 days/week                                 | 2 (1.9)                                                                          | 6 (3.4)    | 15 (8.3)   |                         |
| Frequency of sugary beverage consumption      |                                                                                  |            |            |                         |
| ≤ 4 days/week                                 | 72 (67.3)                                                                        | 130 (73.9) | 116 (64.1) | 0.132                   |
| > 4 days/week                                 | 35 (32.7)                                                                        | 46 (26.1)  | 65 (35.9)  |                         |
| Frequency of instant food consumption         |                                                                                  |            |            |                         |
| ≤ 4 days/week                                 | 103 (96.3)                                                                       | 171 (97.2) | 171 (94.5) | 0.431                   |
| > 4 days/week                                 | 4 (3.7)                                                                          | 5 (2.8)    | 10 (5.5)   |                         |
| Eating foods or snacks during online learning |                                                                                  |            |            |                         |
| No                                            | 79 (73.8)                                                                        | 116 (65.9) | 109 (60.2) | 0.063                   |
| Yes                                           | 28 (26.2)                                                                        | 60 (34.1)  | 72 (39.8)  |                         |
| Drinking beverages during online learning     |                                                                                  |            |            |                         |
| No                                            | 22 (20.6)                                                                        | 36 (20.5)  | 28 (15.5)  | 0.397                   |
| Yes                                           | 85 (79.4)                                                                        | 140 (79.5) | 153 (84.5) |                         |
| Duration of sleep                             |                                                                                  |            |            |                         |
| < 6 h/night                                   | 25 (23.4)                                                                        | 56 (31.8)  | 63 (34.8)  | 0.037*                  |
| 6-8 h/night                                   | 71 (66.4)                                                                        | 113 (64.2) | 112 (61.9) |                         |
| > 8 h/night                                   | 11 (10.3)                                                                        | 7 (4.0)    | 6 (3.3)    |                         |
| Duration of exercise                          |                                                                                  |            |            |                         |
| No exercise                                   | 59 (55.1)                                                                        | 84 (47.7)  | 106 (58.6) | 0.156                   |
| < 3 times or 150 min/week                     | 29 (27.1)                                                                        | 67 (38.1)  | 52 (28.7)  |                         |
| ≥ 3 times or 150 min/week                     | 19 (17.7)                                                                        | 25 (14.2)  | 23 (12.7)  |                         |
| Self-cooking                                  |                                                                                  |            |            |                         |
| No                                            | 72 (67.3)                                                                        | 98 (55.7)  | 111 (61.3) | 0.148                   |
| Yes                                           | 35 (32.7)                                                                        | 78 (44.3)  | 70 (38.7)  |                         |
| Skipping breakfast                            |                                                                                  |            |            |                         |
| < 3 times/week or none                        | 26 (24.3)                                                                        | 50 (28.4)  | 38 (21.0)  | 0.265                   |
| ≥ 3 times/week                                | 81 (75.7)                                                                        | 126 (71.6) | 143 (79.0) |                         |
| The quality of life in mental health          |                                                                                  |            |            |                         |
| Poor                                          | 3 (2.8)                                                                          | 19 (10.8)  | 26 (14.4)  | 0.017*                  |
| Fair                                          | 69 (64.5)                                                                        | 117 (66.5) | 113 (62.4) |                         |
| Good                                          | 35 (32.7)                                                                        | 40 (22.7)  | 42 (23.2)  |                         |

Notes. n = numbers of participant; \*p-value < 0.05
